# Supplementary material for: Enhancing COVID-19 Epidemic Forecasting Accuracy by Combining Real-time and Historical Data From Multiple Internet-Based Sources: Analysis of Social Media Data, Online News Articles, and Search Queries
Source: JMIR Public Health Surveill. 2022 Jun 16;8(6):e35266. doi: 10.2196/35266 (PMC9205424; doi:10.2196/35266)
Supplement: Multimedia Appendix 3 [file publichealth_v8i6e35266_app3.docx]

## **Multimedia Appendix 3. Descriptions and formulations of baseline models.**

1. Autoregression model based on historical COVID-19 new confirmed case counts only [16,26], denoted as AR():

(1)

1. Autoregression model adding the fraction of COVID-19 related online news articles as exogenous input [16], denoted as AR()+News():

(2)

1. Autoregression model adding the fraction of microblogs as exogenous input [26], denoted as AR()+Mblog():

(3)

1. Autoregression model adding search volume as exogenous input [36], denoted as AR()+Query():

(4)

1. Multivariable linear model adding the fraction of real-time online news articles, the fraction of microblogs, and search query volume into historical COVID-19 official report data [11,20], denoted as AR()+News(1)+Mblog(1)+Query(1):

(5)

whereis the time lag that leads to the highest forecasting accuracy for the baseline model AR(), is the time lag that leads to the highest forecasting accuracy for model AR()+News(), is the time lag that leads to the highest forecasting accuracy for model AR()+Mblog(), and is the time lag that leads to the highest forecasting accuracy for model AR()+News() (see Multimedia Appendix 2 for detailed lag selections).
