# Supplementary material for: Enhancing COVID-19 Epidemic Forecasting Accuracy by Combining Real-time and Historical Data From Multiple Internet-Based Sources: Analysis of Social Media Data, Online News Articles, and Search Queries
Source: JMIR Public Health Surveill. 2022 Jun 16;8(6):e35266. doi: 10.2196/35266 (PMC9205424; doi:10.2196/35266)
Supplement: Multimedia Appendix 4 [file publichealth_v8i6e35266_app4.docx]

**Multimedia Appendix 4. Accuracy indexes.**

The RMSE, R2, and MAE of the estimator to the target daily new confirmed COVID-19 related confirmed case counts are defined, respectively, as RMSE=, MAE=, and MAPE=. The correlation of estimator to the target daily new confirmed case counts is their sample correlation coefficient. The correlation of increment between and is defined as Corr. of increment() = Corr().
